# Supplementary material for: Controllable assembly over two CoII-based coordination polymers: structures and catalytic properties towards the alkene oxyalkylation reaction
Source: Royal Society of Chemistry journal article supplement (doi:10.1039/d4ce00857j), 2024-01-01
Supplement: d4ce00857j1.pdf [file d4ce00857j1.pdf]

# Supporting Information

## Controllable Assembly over two Co<sup>II</sup>-based Coordination

### Polymers: Structures and Catalytic properties towards Alkene

#### Oxyalkylation Reaction

Li-Mei Xu,<sup>a</sup> Qian Wang,<sup>a</sup> Lin Zhang,<sup>b</sup> Jin-Qiu Shen,<sup>a</sup> Xiao-Lu Chen,<sup>a</sup> Jian-Yong Zhang<sup>a,\*</sup> and Zhen-Jiang Liu<sup>\*.b</sup>

<sup>a</sup> School of Chemical and Environmental Engineering, Shanghai Institute of Technology, Shanghai, 201418, P. R. China.

<sup>b</sup> School of Chemistry and Materials Engineering, Fuyang Normal University, No. 100, Qinghe West Road, Fuyang City, Anhui Province, 236041, P. R. China.

E-mail: [jianyong1106@163.com](mailto:jianyong1106@163.com), [zjliu@sit.edu.cn](mailto:zjliu@sit.edu.cn)

#### Synthesis of 4,4',4''-(2,4,6-trimethylbenzene-1,3,5-triyl)tripyrindine (4-TMTBT):

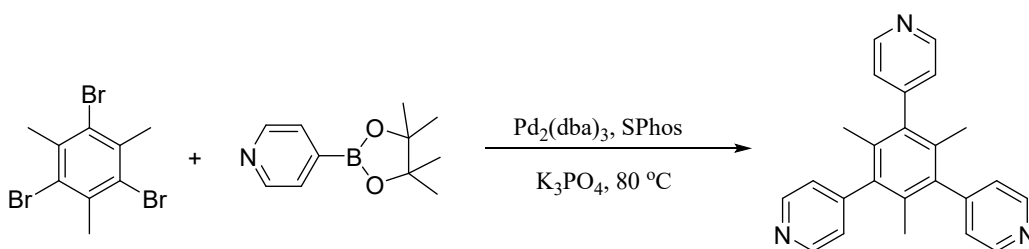

1,3,5-Tribromo-2,4,6-trimethylbenzene (357 mg, 1.0 mmol, 1 eq.), 4-Pyridineboronic acid pinacol ester (1.64 g, 8 mmol, 8 eq.), K<sub>3</sub>PO<sub>4</sub> (2.55 mg, 12 mmol, 12 eq), Pd<sub>2</sub>(dba)<sub>3</sub> (20 mg, 0.022 mmol, 0.022 eq.) and SPhos (18 mg, 0.044 mmol, 0.044 eq.) were mixed under inert atmosphere in n-butanol (50 mL). The resulting mixture was stirred at 80 °C for 3 d. After cooled down to room temperature, the reaction was filtered and washed with MeOH. The solids were suspended in water and acidified with HCl. The resulting mixture was filtered, and the filtrate was basified with NaOH until a white precipitate was obtained. The product was collected by filtration and washed with water and diethyl ether. The product 4-TMTBT was purified by column chromatography (SiO<sub>2</sub>, EA) and obtained as a white solid (176 mg, 0.5 mmol, yield: 50%).

<sup>1</sup>H NMR (400 MHz, CDCl<sub>3</sub>) δ 8.71(d, 6H), 7.18 (d, 6H), 1.70 (s, 9H).

<sup>13</sup>C NMR (100 MHz, CDCl<sub>3</sub>) δ 150.13, 149.34, 137.54, 132.21, 124.39, 19.05.

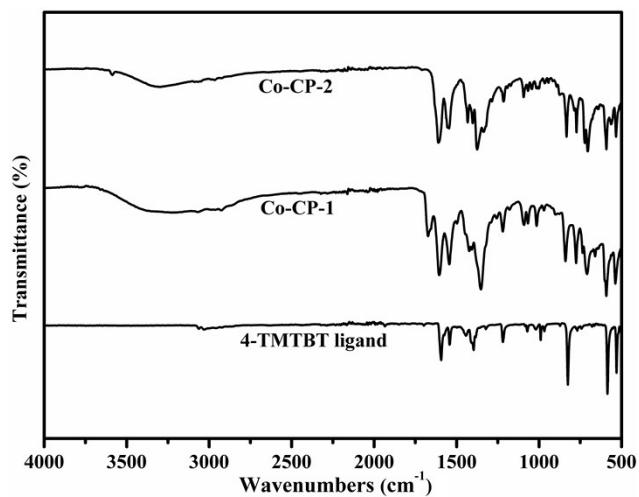

**Figure S1.** The FT-IR spectrum of 4-TMTBT, Co-CP-1 and Co-CP-2 compound.

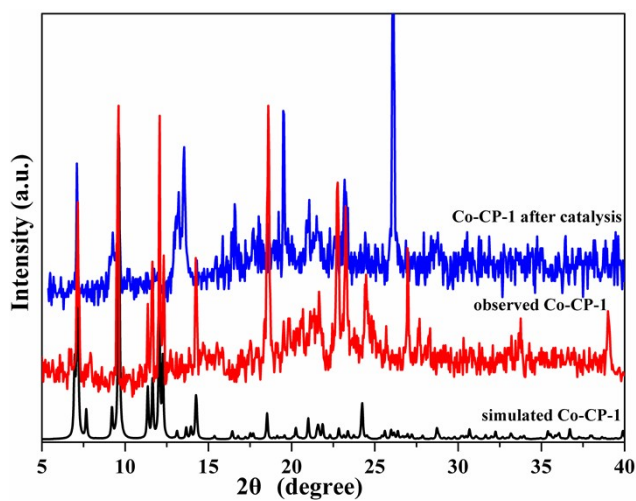

**Figure S2.** The PXRD curves over Co-CP-1 before and after catalysis.

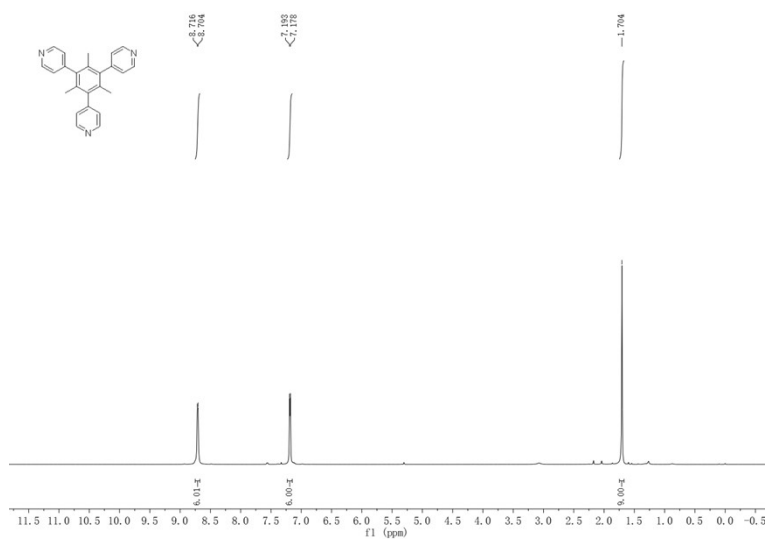

**Figure S3** <sup>1</sup>H NMR (400 MHz, CDCl<sub>3</sub>) spectroscopy of 4-TMTBT ligand.

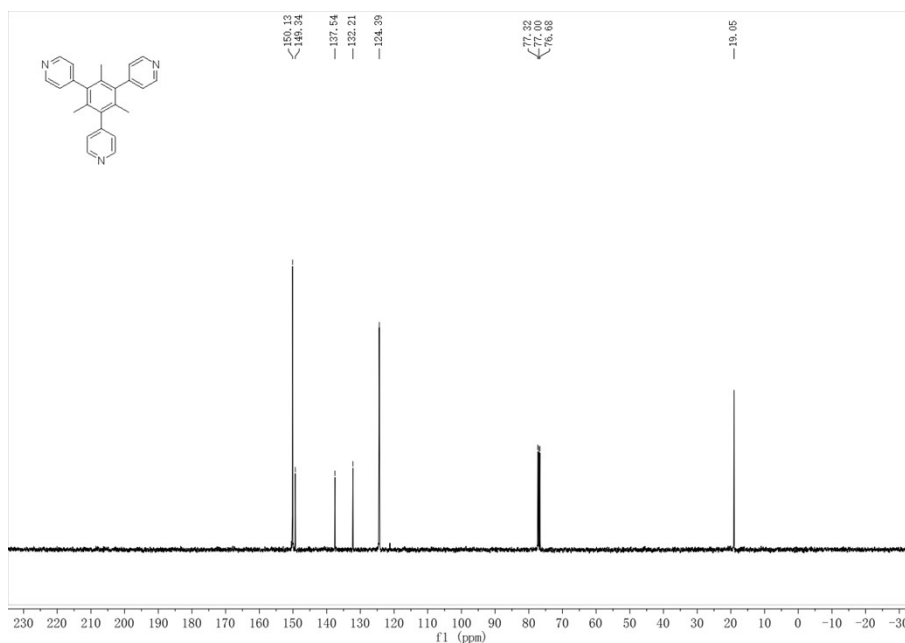

Figure S4  $^{13}\text{C}$  NMR (100 MHz,  $\text{CDCl}_3$ ) spectroscopy of 4-TMTBT ligand.

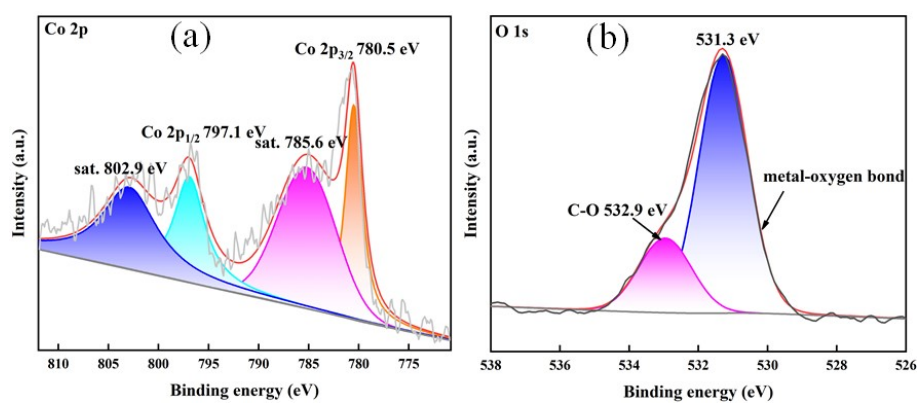

Figure S5. The high-resolution Co 2p and O 1s XPS over Co-CP-1 catalyst.

**<sup>1</sup>H NMR (400 MHz, CDCl<sub>3</sub>) spectroscopy of 3a.**

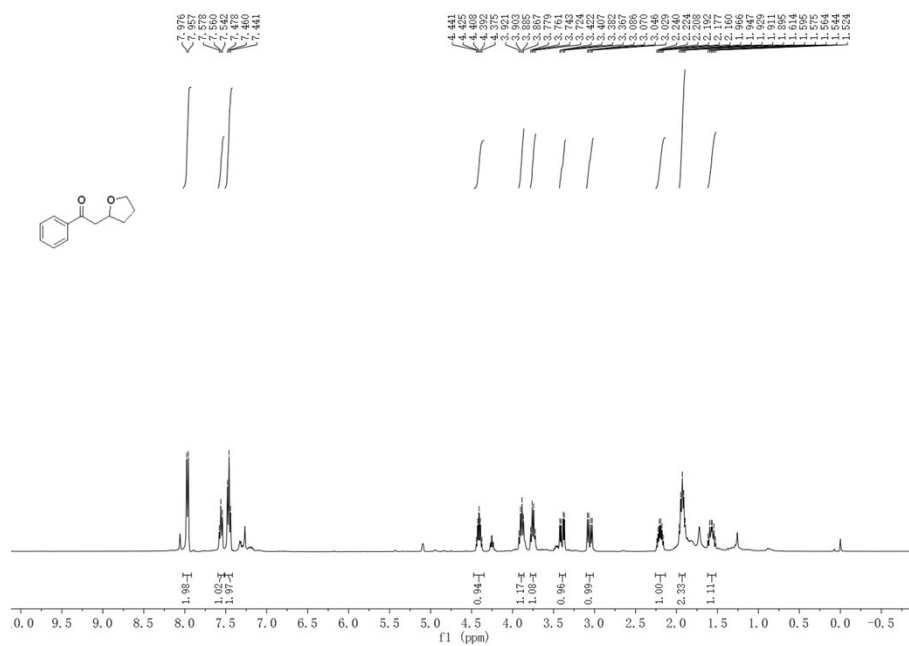

**<sup>13</sup>C NMR (100 MHz, CDCl<sub>3</sub>) spectroscopy of 3a.**

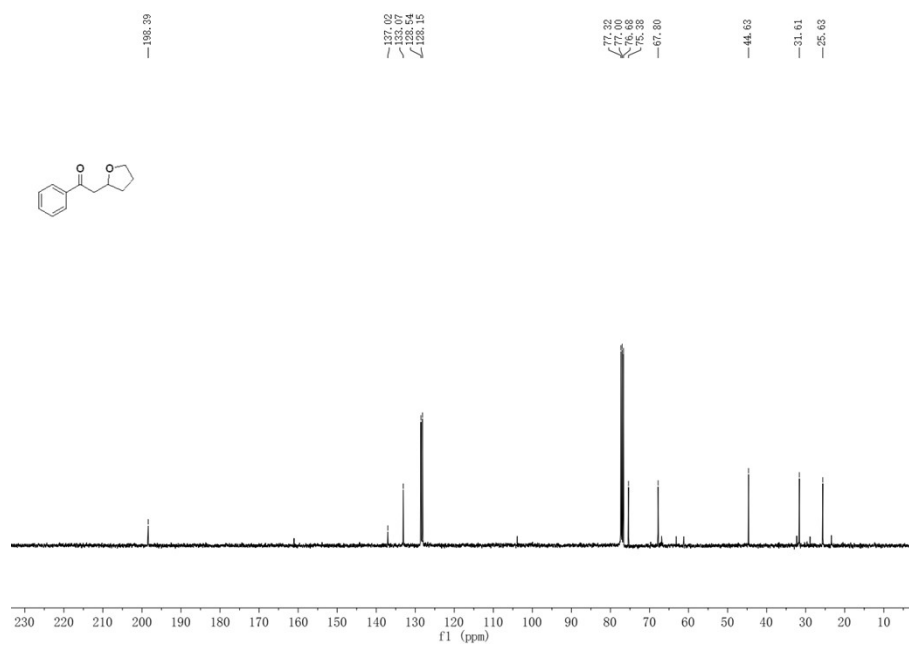

**<sup>1</sup>H NMR (400 MHz, CDCl<sub>3</sub>) spectroscopy of 3b.**

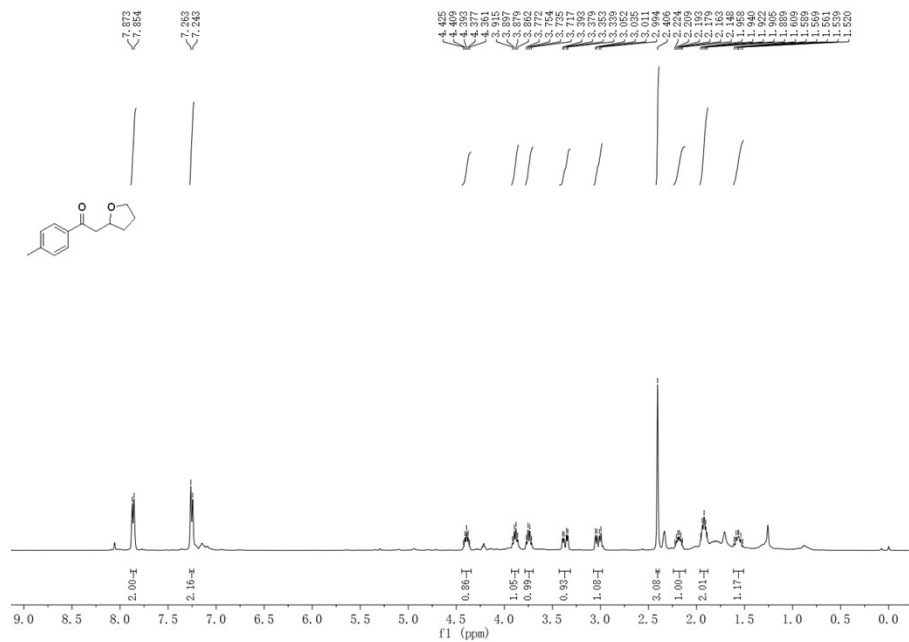

**<sup>13</sup>C NMR (100 MHz, CDCl<sub>3</sub>) spectroscopy of 3b.**

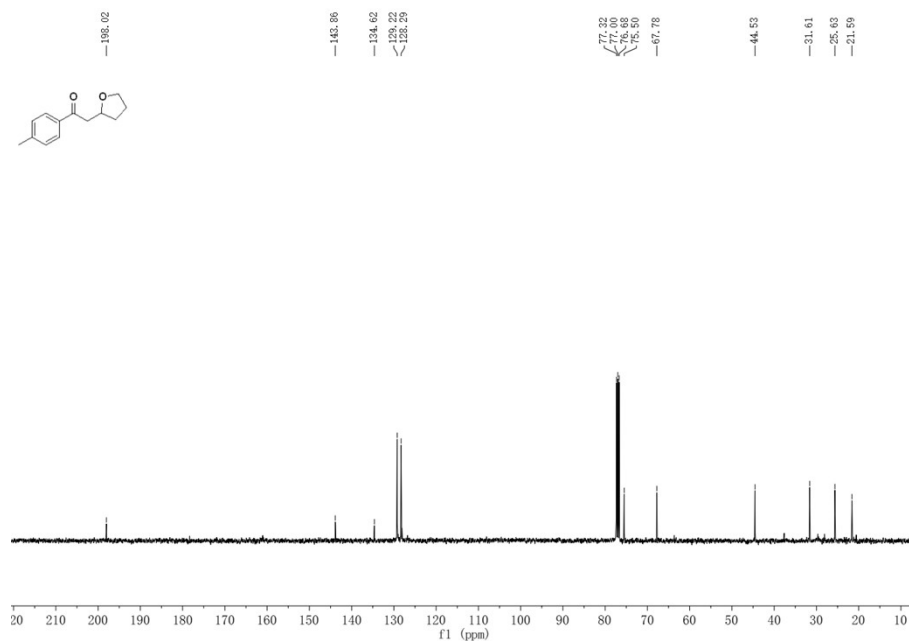

**<sup>1</sup>H NMR (400 MHz, CDCl<sub>3</sub>) spectroscopy of 3e.**

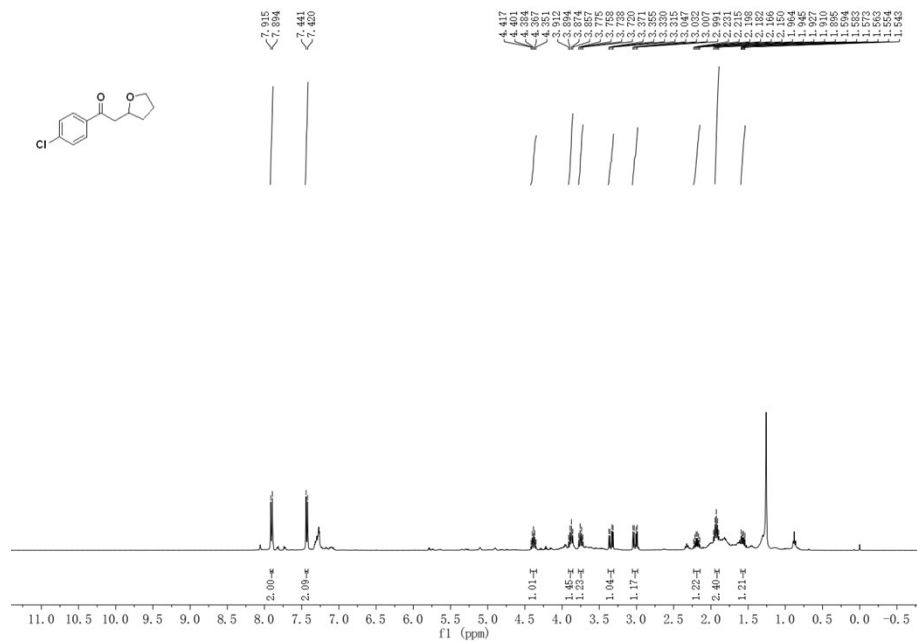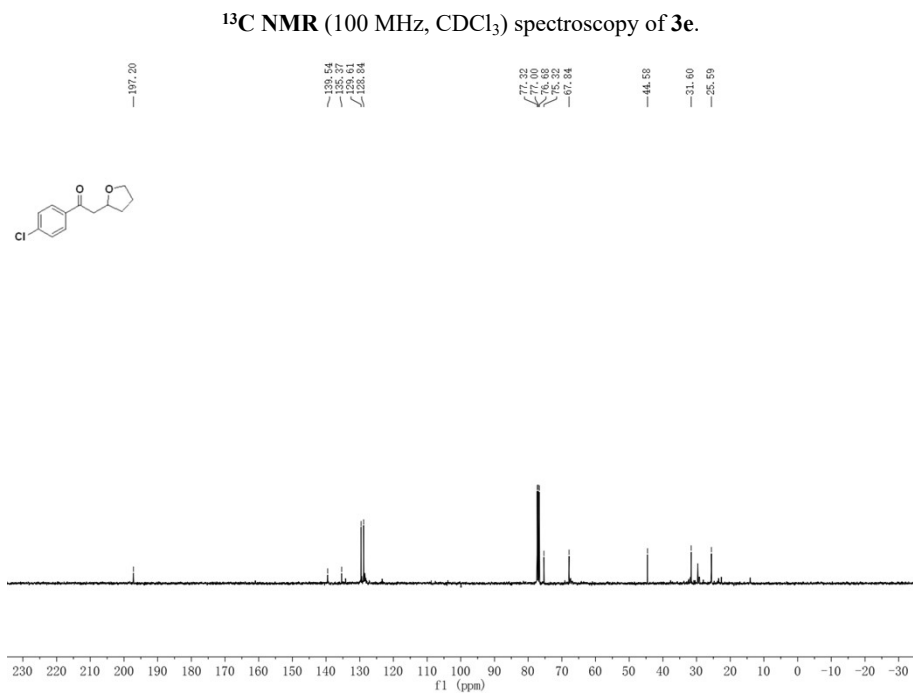

**<sup>1</sup>H NMR (400 MHz, CDCl<sub>3</sub>) spectroscopy of 3g.**

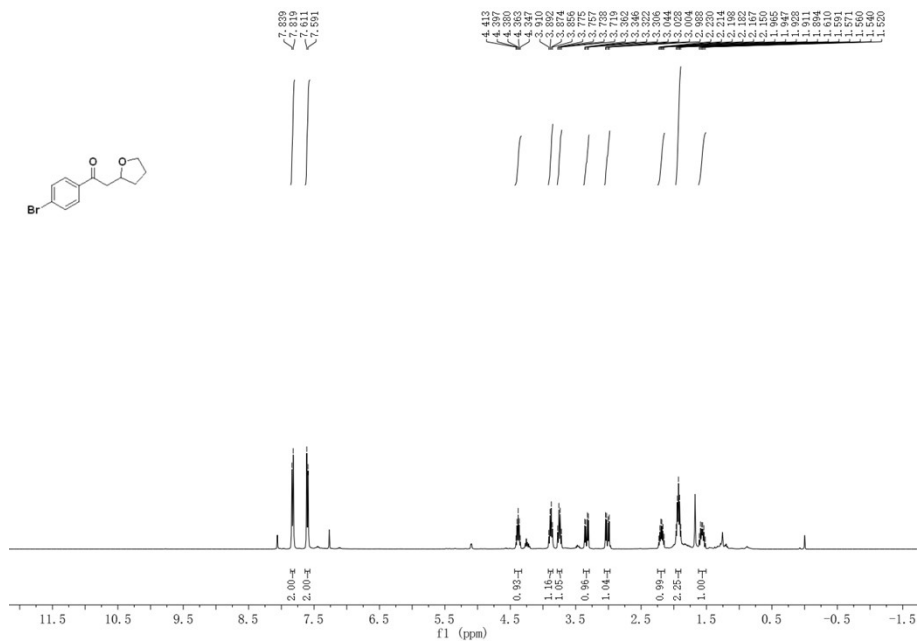

$^{13}\text{C}$  NMR (100 MHz,  $\text{CDCl}_3$ ) spectroscopy of **3g**.

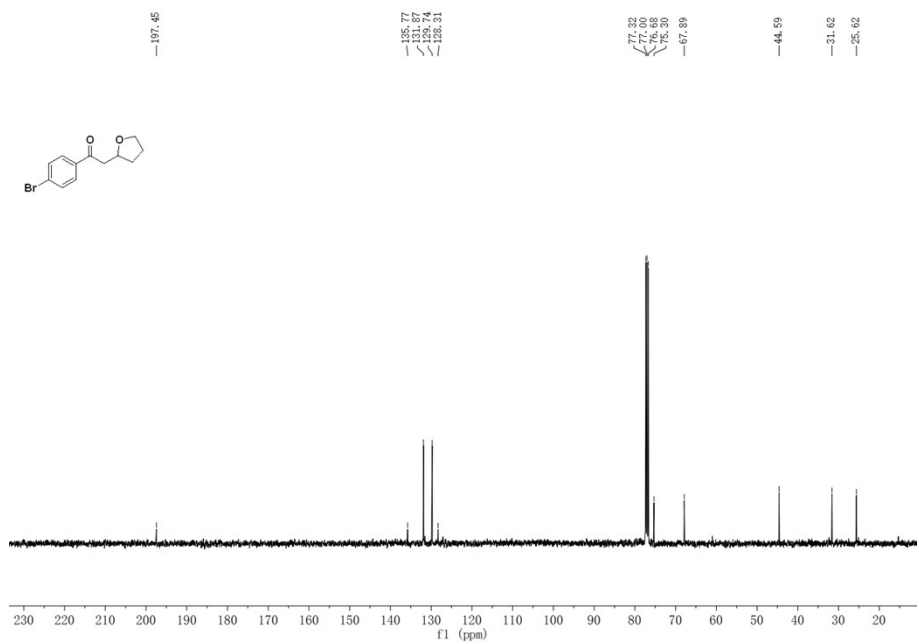

$^1\text{H}$  NMR (400 MHz,  $\text{CDCl}_3$ ) spectroscopy of **3j**.

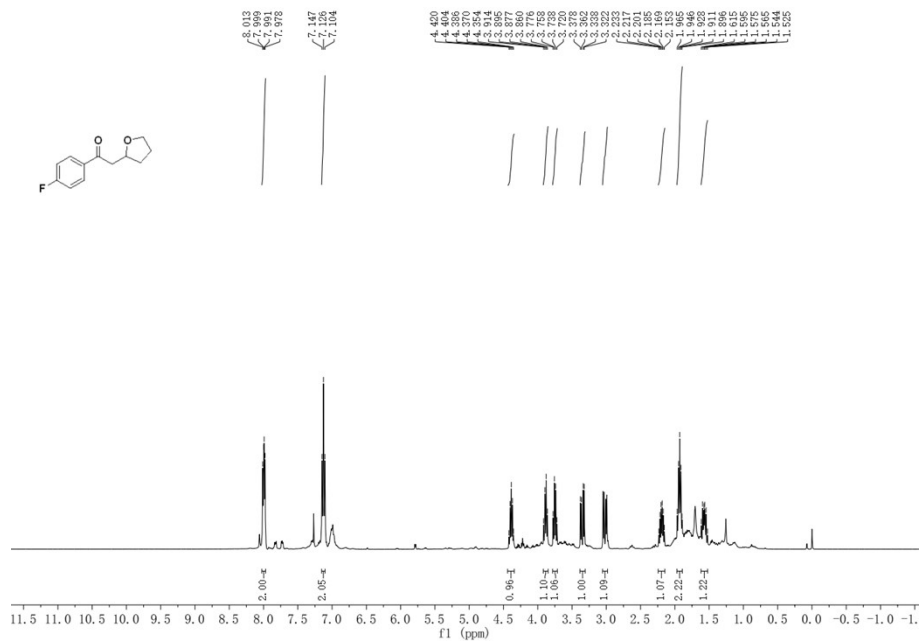

<sup>13</sup>C NMR (100 MHz, CDCl<sub>3</sub>) spectroscopy of 3j.

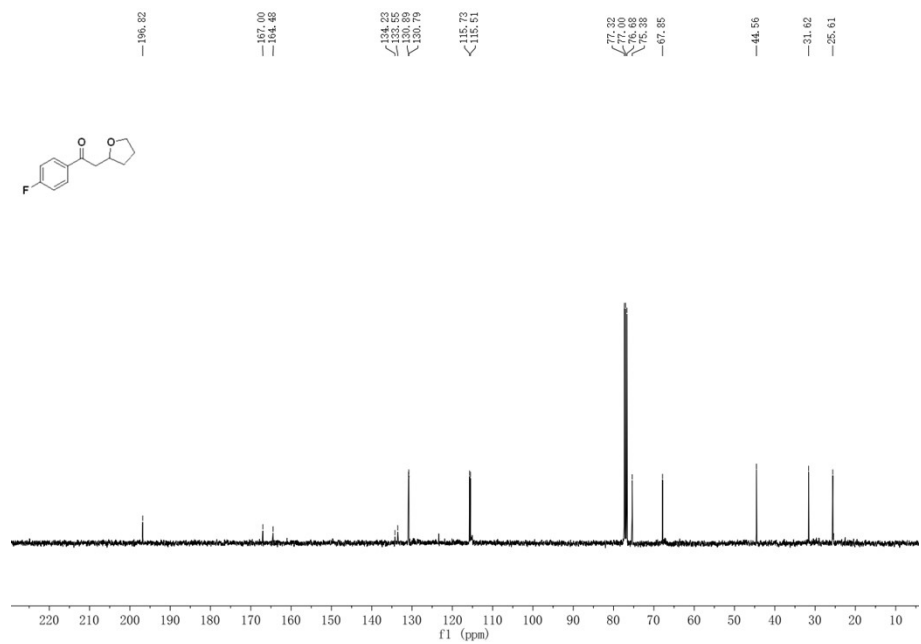

<sup>1</sup>H NMR (400 MHz, CDCl<sub>3</sub>) spectroscopy of 3k.



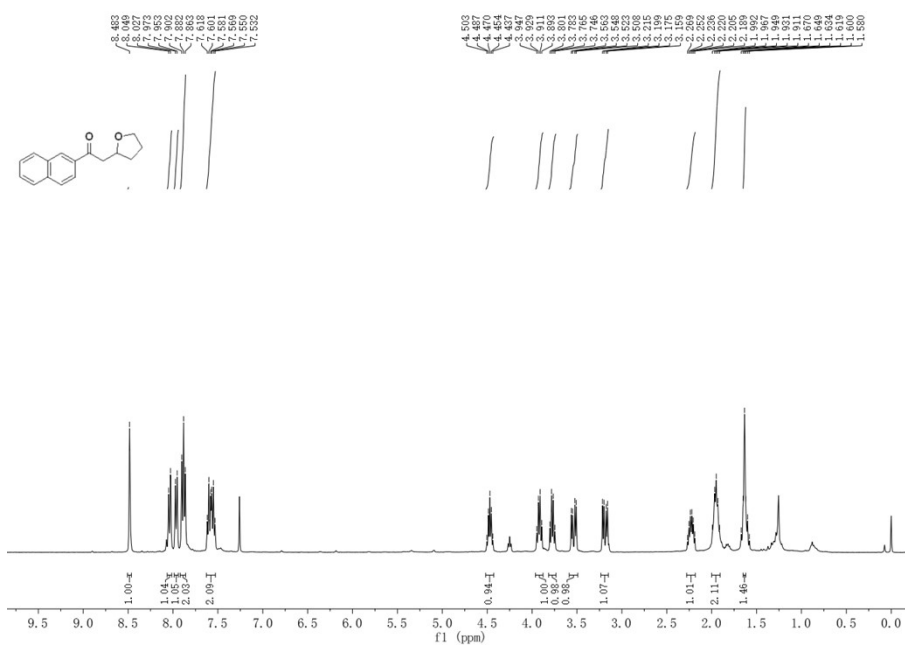

<sup>13</sup>C NMR (100 MHz, CDCl<sub>3</sub>) spectroscopy of **3k**.

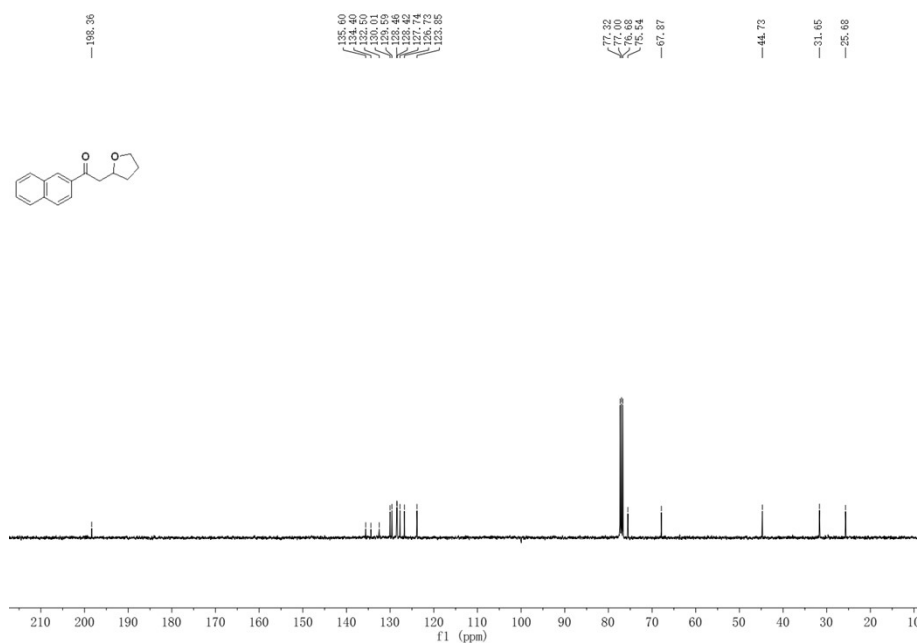

Table S1. Selected bond distances [ $\text{\AA}$ ] and angles [ $^\circ$ ] for **Co-CP-1** and **Co-CP-2**.

|              |            |                |            |
|--------------|------------|----------------|------------|
| Co1-O2       | 1.992(3)   | Co1-O3#1       | 2.215(4)   |
| Co1-O4#1     | 2.177(3)   |                |            |
| Co1-N1       | 2.153(4)   | Co1-N2#2       | 2.196(3)   |
| Co1-N2#3     | 2.196(3)   |                |            |
| O2- Co1-O3#1 | 94.75(14)  | O2- Co1-O4#1   | 154.46(14) |
| O2- Co1-N1   | 114.70(15) | O2- Co1-N2#2   | 91.85(7)   |
| O2- Co1-N2#3 | 91.85(7)   | O3#1- Co1-O4#1 | 59.71(11)  |

|                                                                                                                                                                              |            |                |            |
|------------------------------------------------------------------------------------------------------------------------------------------------------------------------------|------------|----------------|------------|
| O4#1- Co1-N2#2                                                                                                                                                               | 89.62(7)   | O4#1- Co1-N2#3 | 89.62(7)   |
| O3#1- Co1-N1                                                                                                                                                                 | 150.56(14) | N1- Co1-O4#1   | 90.85(13)  |
| N1- Co1-N2#2                                                                                                                                                                 | 86.50(7)   | N1- Co1-N2#3   | 86.50(7)   |
| N2#3- Co1-O3#1                                                                                                                                                               | 92.84(8)   | N2#2- Co1-O3#1 | 92.84(8)   |
| N2#2- Co1-O5#1                                                                                                                                                               | 87.12(12)  | O7- Co1-O2     | 97.88(9)   |
| N2#3- Co1-N2#2                                                                                                                                                               | 172.94(14) |                |            |
| Symmetry codes for <b>Co-CP-1</b> : #1 $1/2+x, +y, 5/2-z$ ; #2 $2-x, 1-y, 2-z$ ; #3 $2-x, -1/2+y, 2-z$ .                                                                     |            |                |            |
| Co1-O1                                                                                                                                                                       | 2.062(5)   | Co1-O4         | 2.046(4)   |
| Co1-O5                                                                                                                                                                       | 2.066(5)   | Co1-O6#1       | 2.106(5)   |
| Co1-O12                                                                                                                                                                      | 2.177(5)   | Co1-N1#2       | 2.160(6)   |
| Co2-O2#3                                                                                                                                                                     | 2.066(5)   | Co2-O4#4       | 2.101(4)   |
| Co2-O7                                                                                                                                                                       | 2.068(5)   | Co2-O9         | 2.068(5)   |
| Co2-O10                                                                                                                                                                      | 2.068(5)   | Co2-N2         | 2.161(6)   |
| Co3-O3                                                                                                                                                                       | 2.106(5)   | Co3-O4         | 2.062(5)   |
| Co3-O8#5                                                                                                                                                                     | 2.066(5)   | Co3-O11#1      | 2.095(6)   |
| Co3-O13                                                                                                                                                                      | 2.165(4)   | Co3-N3#6       | 2.143(6)   |
| O4-Co1-O1                                                                                                                                                                    | 97.2(2)    | O4-Co1-O5      | 92.5(2)    |
| O1-Co1-O5                                                                                                                                                                    | 168.7(2)   | O4-Co1-O6      | 98.50(19)  |
| O1-Co1-O6                                                                                                                                                                    | 91.4(2)    | O5-Co1-O6      | 92.9(2)    |
| O4-Co1-N1                                                                                                                                                                    | 174.5(2)   | O1-Co1-N1      | 83.0(2)    |
| O5-Co1-N1                                                                                                                                                                    | 86.8(2)    | O6-Co1-N1      | 87.0(2)    |
| O4-Co1-O12                                                                                                                                                                   | 89.5(2)    | O1-Co1-O12     | 93.1(2)    |
| O5-Co1-O12                                                                                                                                                                   | 81.1(2)    | O6-Co1-O12     | 170.2(2)   |
| N1-Co1-O12                                                                                                                                                                   | 85.0(2)    | O2-Co2-O10     | 92.2(3)    |
| O2-Co2-O7                                                                                                                                                                    | 86.9(2)    | O10-Co2-O7     | 173.3(2)   |
| O2-Co2-O9                                                                                                                                                                    | 171.0(2)   | O10-Co2-O9     | 87.8(2)    |
| O7-Co2-O9                                                                                                                                                                    | 92.0(2)    | O2-Co2-O4      | 100.90(18) |
| O10-Co2-O4                                                                                                                                                                   | 85.99(19)  | O7-Co2-O4      | 100.7(2)   |
| O9-Co2-O4                                                                                                                                                                    | 88.11(19)  | O2-Co2-N2      | 89.5(2)    |
| O10-Co2-N2                                                                                                                                                                   | 80.7(2)    | O7-Co2-N2      | 92.7(2)    |
| O9-Co2-N2                                                                                                                                                                    | 81.6(2)    | O4-Co2-N2      | 163.4(2)   |
| O4-Co3-O8                                                                                                                                                                    | 94.89(18)  | O4-Co3-O11     | 94.29(18)  |
| O8-Co3-O11                                                                                                                                                                   | 92.0(2)    | O4-Co3-O3      | 95.10(18)  |
| O8-Co3-O3                                                                                                                                                                    | 94.8(2)    | O11-Co3-O3     | 167.87(18) |
| O4-Co3-N3                                                                                                                                                                    | 177.0(2)   | O8-Co3-N3      | 86.2(2)    |
| O11-Co3-N3                                                                                                                                                                   | 88.5(2)    | O3-Co3-N3      | 82.0(2)    |
| O4-Co3-O13                                                                                                                                                                   | 90.95(17)  | O8-Co3-O13     | 172.9(2)   |
| O11-Co3-O13                                                                                                                                                                  | 83.6(2)    |                |            |
| Symmetry codes for <b>Co-CP-2</b> : #1 $-0.5+x, 0.5-y, -0.5+z$ ; #2 $-0.5+x, 0.5-y, 0.5+z$ ; #3 $0.5+x, 0.5+y, +z$ ; #4 $0.5+x, 0.5-y, 0.5+z$ ; #5 $+x, -y, -0.5+z$ ; #6 $-$ |            |                |            |

$$1.5+x, 0.5-y, -0.5+z.$$

The computed results of the (3,7)-connected net of **Co-CP-2** by TOPOS 4.0 are as follows:

Topology for Sc1

-----

Atom Sc1 links by bridge ligands and has

| Common vertex with |        |        |        |          | R(A-A) |   |
|--------------------|--------|--------|--------|----------|--------|---|
| V 1                | 1.2598 | 0.8732 | 1.3291 | ( 1 0 1) | 9.808A | 1 |
| V 1                | 0.2598 | 0.8732 | 1.3291 | ( 0 0 1) | 9.866A | 1 |
| V 1                | 0.2598 | 0.8732 | 0.3291 | ( 0 0 0) | 9.986A | 1 |

Topology for V1

Atom V1 links by bridge ligands and has

| Common vertex with |         |        |         |          | R(A-A)  |   |
|--------------------|---------|--------|---------|----------|---------|---|
| Sc 1               | -0.4044 | 0.8673 | -0.0031 | (-1 0-1) | 9.808A  | 1 |
| Sc 1               | 0.5956  | 0.8673 | -0.0031 | ( 0 0-1) | 9.866A  | 1 |
| Sc 1               | 0.5956  | 0.8673 | 0.9969  | ( 0 0 0) | 9.986A  | 1 |
| V 1                | 0.7598  | 0.6268 | 0.8291  | ( 0 1 0) | 10.618A | 1 |
| V 1                | -0.2402 | 0.6268 | -0.1709 | (-1 1-1) | 10.618A | 1 |
| V 1                | 0.2598  | 1.1268 | 0.8291  | ( 0 2 0) | 10.728A | 1 |
| V 1                | 0.2598  | 1.1268 | -0.1709 | ( 0 2-1) | 10.728A | 1 |

Coordination sequences

-----

Sc1: 1 2 3 4 5 6 7 8 9 10  
 Num 3 16 45 84 135 198 273 360 459 570  
 Cum 4 20 65 149 284 482 755 1115 1574 2144

-----

V1: 1 2 3 4 5 6 7 8 9 10  
 Num 7 24 53 94 147 212 289 378 479 592  
 Cum 8 32 85 179 326 538 827 1205 1684 2276

-----

TD10=2210

Vertex symbols for selected sublattice

-----

Sc1 Point (Schlafli) symbol: {4<sup>2</sup>.6}

-----

V1 Point (Schlafli) symbol: {4<sup>6</sup>.6<sup>15</sup>}

Extended point symbol:

[4.4.4.4.4.6.6(2).6(2).6(2).6(2).6(3).6(3).6(4).6(4).6(5).6(5).6(7).6(7).6(7).6(7)]

Point (Schlafli) symbol for net: {4<sup>2</sup>.6} {4<sup>6</sup>.6<sup>15</sup>}

**3,7-c net with stoichiometry (3-c)(7-c); 2-nodal net**

New topology, please, contact the authors (67300 types in 9 databases)
